# Supplementary material for: Residential Environment Assessment by Older Adults in Nursing Homes during COVID-19 Outbreak
Source: MDPI journal article supplement (doi:10.3390/ijerph192316354), 2022-12-06
Supplement: s1 [file s1]

**Table S1.** Principal Components Analysis of the Assessment of the Residential Environment scale (EVAER)

| Items                                                                                                                                                                                                          | Components                                             |                                                           |                                  |                  | Comunalities |
|----------------------------------------------------------------------------------------------------------------------------------------------------------------------------------------------------------------|--------------------------------------------------------|-----------------------------------------------------------|----------------------------------|------------------|--------------|
|                                                                                                                                                                                                                | 1: Relationships (workers, residents, family, friends) | 2: Nursing home aspects (management, security, amenities) | 3: Mobility (outdoor and indoor) | 4: Privacy space |              |
| 2. Relationships with nursing home workers                                                                                                                                                                     | 0.80                                                   |                                                           |                                  | 0.34             | 0.81         |
| 1. Friendships with other residents                                                                                                                                                                            | 0.75                                                   |                                                           |                                  |                  | 0.67         |
| 3. Relationships with family members (e.g., visits in person, by phone, email, other means)                                                                                                                    | 0.66                                                   |                                                           | 0.35                             |                  | 0.58         |
| 4. Relationships with friends (e.g., visits in person, by phone, email, other means)                                                                                                                           | 0.56                                                   |                                                           | 0.56                             |                  | 0.69         |
| 10. How well their residential home has managed during the COVID-19 pandemic                                                                                                                                   |                                                        | 0.85                                                      |                                  |                  | 0.76         |
| 7. Their perception of safety in the residential home                                                                                                                                                          | 0.31                                                   | 0.77                                                      |                                  |                  | 0.72         |
| 8. Characteristics and quality of the residential home's amenities; (e.g., room size and design, natural lighting, noise level, temperature, green areas)                                                      |                                                        | 0.66                                                      |                                  | 0.42             | 0.64         |
| 6. The chance to go outside the residential home for different activities (e.g., walking around the neighbourhood or town, shopping, doing other leisure activities, visiting friends) (outdoor accessibility) |                                                        |                                                           | 0.87                             |                  | 0.80         |
| 5. Getting around easily within the residential home (e.g., without: obstacles or barriers, ramps, stairs, ...) (indoor accessibility)                                                                         |                                                        |                                                           | 0.76                             |                  | 0.74         |
| 9. Having a space for privacy (having a single room or other personal space so as not to be disturbed)                                                                                                         |                                                        |                                                           |                                  | 0.86             | 0.83         |

Extraction method: Principal Component Analysis. Rotation method: Varimax with Kaiser normalization (rotation converged in 8 iterations).

Total variance explained: 72.2%

Factor loadings  $\geq 0.300$  in absolute value are shown. In grey, secondary factors loadings.

The Kaiser-Meyer-Olkin (KMO) of sampling adequacy = 0.823. The Bartlett's Test:  $\chi^2 = 976.520$ ,  $df = 45$ ,  $p < 0.001$ .

The Cronbach's Alpha coefficient: for all items = 0.84; component 1 = 0.77; component 2 = 0.72; component 3 = 0.74; component 4 = no Cronbach's Alpha for this factor based on a single variable.

**Table S2.** Grouping of subjects according to residential assessment

| <b>Subscales of the Residential Environment Assessment</b>                                 | <b>Final Clusters Centres</b>                                                 |                                                               |                                                                 |
|--------------------------------------------------------------------------------------------|-------------------------------------------------------------------------------|---------------------------------------------------------------|-----------------------------------------------------------------|
|                                                                                            | <b>Cluster 1:<br/>medium-high rating<br/>of all residential as-<br/>pects</b> | <b>Cluster 2:<br/>low rating<br/>linked to mo-<br/>bility</b> | <b>Cluster 3:<br/>low rating of all<br/>residential aspects</b> |
| Relationships (workers, residents, family, friends)                                        | 0.35                                                                          | -0.22                                                         | -1.50                                                           |
| Nursing home aspects (management, security, amenities)                                     | 0.28                                                                          | 0.35                                                          | -1.85                                                           |
| Mobility (outdoor and indoor accessibility)                                                | 0.51                                                                          | -1.43                                                         | -1.13                                                           |
| Space for privacy (having a single room or other personal space so as not to be disturbed) | 0.30                                                                          | 0.13                                                          | -1.65                                                           |
| Valid number of cases: 421                                                                 | 301                                                                           | 65                                                            | 55                                                              |
| %                                                                                          | 71.5                                                                          | 15.4                                                          | 13.1                                                            |

The 98.3% of original grouped cases were correctly classified through Discriminant Analysis.

**Table S3.** Residential assessment clusters according to personal and contextual conditions

| Topic                                | ANOVA Tests f Between-Subjects Effects (1)                                             |       |       | Chi-Square Tests (2)                                                                                                                                                                                                                               |        |    |       |
|--------------------------------------|----------------------------------------------------------------------------------------|-------|-------|----------------------------------------------------------------------------------------------------------------------------------------------------------------------------------------------------------------------------------------------------|--------|----|-------|
|                                      | Variable (N; Minimum; Maximum; Mean)                                                   | F     | Sig   | Variable                                                                                                                                                                                                                                           | Value  | df | Sig   |
| <b>Sociodemographic features</b>     | Age in years (447; 61; 99; 83.80)                                                      | 4.858 | 0.008 | Gender                                                                                                                                                                                                                                             | 11.433 | 2  | 0.003 |
|                                      | Level of education (447; 1.00; 5.00; 2.99)                                             | 0.380 | 0.684 | Marital status (married/living with partner; separated/divorced; single; widow/er)                                                                                                                                                                 | 28.008 | 6  | 0.000 |
|                                      | Total number of children (447; 0; 9; 1.56)                                             | 4.729 | 0.009 |                                                                                                                                                                                                                                                    |        |    |       |
| <b>Residential environment</b>       |                                                                                        |       |       | Room availability (Single; Shared with spouse/partner/family member; Shared with another resident)                                                                                                                                                 | 15.508 | 4  | 0.004 |
|                                      |                                                                                        |       |       | Where did you spend most of your time during the COVID-19 lockdown? (Always in my room; I made limited use of different areas; Unrestricted use of all spaces in the care home)                                                                    | 22.301 | 4  | 0.000 |
| <b>Media means for relationships</b> |                                                                                        |       |       | Devices or mobile systems used to maintain relationships with your family or friends (Through my own devices; Through other people's or residential home's devices; I do not have access to those devices; Don't know, don't know that technology) | 15.844 | 4  | 0.003 |
| <b>Coronavirus status</b>            |                                                                                        |       |       | Coronavirus status (I have not had the disease; I have had the disease, but I am still suffering after-effects; I have had the disease, but I do not have any after-effects)                                                                       | 0.673  | 4  | 0.955 |
|                                      | Fear of COVID 19 Infection FCV-19S (447; 7; 35; 18,4)                                  | 3.291 | 0.038 |                                                                                                                                                                                                                                                    |        |    |       |
|                                      | Worried about the COVID-19 pandemic (443; 1.00; 4.00; 2.82)                            | 0.433 | 0.649 |                                                                                                                                                                                                                                                    |        |    |       |
|                                      | Number of protective measures to keep yourself safe from coronavirus (447; 0; 7; 3.96) | 5.994 | 0.003 |                                                                                                                                                                                                                                                    |        |    |       |
| <b>Physical health</b>               | Number of previous diagnosed pathologies (439; 1; 12; 6.06)                            | 0.464 | 0.629 |                                                                                                                                                                                                                                                    |        |    |       |

|                                      |                                                                                                                                          |        |       |                                                                                                                             |        |   |       |
|--------------------------------------|------------------------------------------------------------------------------------------------------------------------------------------|--------|-------|-----------------------------------------------------------------------------------------------------------------------------|--------|---|-------|
|                                      | Number of medications taken (439; 1; 8; 3.44)                                                                                            | 1.514  | 0.222 |                                                                                                                             |        |   |       |
|                                      | Self-assessment of health status, 3G (447; 1.00; 3.00; 2.45)                                                                             | 3.780  | 0.024 |                                                                                                                             |        |   |       |
| <b>Mental health</b>                 | The Abbreviated Geriatric Depression Scale-Yesavage (GDS-5) (447; 0; 5; 1.67)                                                            | 11.506 | 0.000 |                                                                                                                             |        |   |       |
| <b>Affects</b>                       | The Positive and Negative Affect Schedule (PANAS) (447; -12; 15; 2.74)                                                                   | 9.706  | 0.000 |                                                                                                                             |        |   |       |
|                                      | How often do you feel lonely? (447; 1.00; 4.00; 1.94)                                                                                    | 9.777  | 0.000 |                                                                                                                             |        |   |       |
| <b>Resilience</b>                    | The Brief Resilient Coping Scale (BRCS) (447; 4; 20; 15.86)                                                                              | 5.801  | 0.003 |                                                                                                                             |        |   |       |
| <b>Leisure activities</b>            |                                                                                                                                          |        |       | 4 clusters of leisure activities: Use of mobile devices; Rewarding activities, volunteering; Religious practice; Inactivity | 41,515 | 6 | 0.000 |
| <b>Quality of Life and Wellbeing</b> | The Global Quality of Life (the FUMAT scale, 24 items) (447; 45; 95; 79.64)                                                              | 14.903 | 0.000 |                                                                                                                             |        |   |       |
|                                      | Satisfaction with life in comparative perspective (before and during the COVID-19 pandemic) (443; 1.00; 3.00; 1.60)                      | 5.019  | 0.007 |                                                                                                                             |        |   |       |
|                                      | Self-perception of stay in the nursing home in comparative perspective (before and during the COVID-19 pandemic) (429; 1.00; 3.00; 2.12) | 16.468 | 0.000 |                                                                                                                             |        |   |       |
| <b>Ageing self-assessment</b>        | Attitude Toward Own Aging subscale (ATOA) (408; 0; 5; 1.91)                                                                              | 3.687  | 0.026 |                                                                                                                             |        |   |       |

(1) ANOVA used with scale and ordinal variables

(2) Chi-Square test used with nominal variables

In grey shadow, non-significant variables and not used in subsequent analyses
